1 **Expert-Level Detection of Referable Glaucoma from Fundus Photographs in a Safety Net**  
2 **Population: The AI and Teleophthalmology in Los Angeles Initiative**

3

4 **AUTHORS**

5 Van Nguyen<sup>1</sup>, Sreenidhi Iyengar<sup>1</sup>, Haroon Rasheed<sup>1</sup>, Galo Apolo<sup>1</sup>, Zhiwei Li<sup>2</sup>, Aniket Kumar<sup>2</sup>, Hong  
6 Nguyen<sup>2</sup>, Austin Bohner<sup>1</sup>, Rahul Dhodapkar<sup>1</sup>, Jiun Do<sup>3</sup>, Andrew Duong<sup>1</sup>, Jeffrey Gluckstein<sup>1</sup>, Kendra  
7 Hong<sup>1</sup>, Lucas Humayun<sup>4</sup>, Alanna James<sup>1</sup>, Junhui Lee<sup>1</sup>, Kent Nguyen<sup>1</sup>, Brandon Wong<sup>3</sup>, Jose-Luis Ambite,  
8 Carl Kesselman<sup>2</sup>, Lauren Daskivich<sup>3</sup>, Michael Pazzani<sup>2</sup>, Benjamin Y. Xu<sup>1</sup>

9

10 **AFFILIATIONS**

- 11 1. Roski Eye Institute, Keck School of Medicine, University of Southern California, Los Angeles, CA,  
12 USA  
13 2. Information Sciences Institute, University of Southern California, Los Angeles, CA, USA  
14 3. Los Angeles County Department of Health Services, Los Angeles, CA, USA  
15 4. Keck School of Medicine, University of Southern California, Los Angeles, CA, USA

16

17 **Short Title:** Expert-Level Referable Glaucoma Detection in a Safety Net Population

18

19 **Corresponding Author:** Benjamin Xu, Department of Ophthalmology, Keck School of Medicine at the  
20 University of Southern California, 1450 San Pablo Street, 4th Floor, Suite 4700, Los Angeles, CA 90033  
21 Phone number: 323-442-6780; Fax number: 323-442-6412

22 E-mail: [benjamin.xu@med.usc.edu](mailto:benjamin.xu@med.usc.edu)

23

24

25

26

27 **ABSTRACT**

28 **Purpose:** To develop and test a deep learning (DL) algorithm for detecting referable glaucoma in the Los  
29 Angeles County (LAC) Department of Health Services (DHS) teleretinal screening program.

30 **Methods:** Fundus photographs and patient-level labels of referable glaucoma (defined as cup-to-disc ratio  
31 [CDR]  $\geq 0.6$ ) provided by 21 trained optometrist graders were obtained from the LAC DHS teleretinal  
32 screening program. A DL algorithm based on the VGG-19 architecture was trained using patient-level  
33 labels generalized to images from both eyes. Area under the receiver operating curve (AUC), sensitivity,  
34 and specificity were calculated to assess algorithm performance using an independent test set that was also  
35 graded by 13 clinicians with one to 15 years of experience. Algorithm performance was tested using  
36 reference labels provided by either LAC DHS optometrists or an expert panel of 3 glaucoma specialists.

37 **Results:** 12,098 images from 5,616 patients (2,086 referable glaucoma, 3,530 non-glaucoma) were used to  
38 train the DL algorithm. In this dataset, mean age was  $56.8 \pm 10.5$  years with 54.8% females and 68.2%  
39 Latinos, 8.9% Blacks, 2.7% Caucasians, and 6.0% Asians. 1,000 images from 500 patients (250 referable  
40 glaucoma, 250 non-glaucoma) with similar demographics ( $p \geq 0.57$ ) were used to test the DL algorithm.  
41 Algorithm performance matched or exceeded that of all independent clinician graders in detecting patient-  
42 level referable glaucoma based on LAC DHS optometrist (AUC = 0.92) or expert panel (AUC = 0.93)  
43 reference labels. Clinician grader sensitivity (range: 0.33-0.99) and specificity (range: 0.68-0.98) ranged  
44 widely and did not correlate with years of experience ( $p \geq 0.49$ ). Algorithm performance (AUC = 0.93) also  
45 matched or exceeded the sensitivity (range: 0.78-1.00) and specificity (range: 0.32-0.87) of 6 LAC DHS  
46 optometrists in the subsets of the test dataset they graded based on expert panel reference labels.

47 **Conclusions:** A DL algorithm for detecting referable glaucoma developed using patient-level data provided  
48 by trained LAC DHS optometrists approximates or exceeds performance by ophthalmologists and  
49 optometrists, who exhibit variable sensitivity and specificity unrelated to experience level. Implementation  
50 of this algorithm in screening workflows could help reallocate eye care resources and provide more  
51 reproducible and timely glaucoma care.

52

## 53 **Introduction**

54 Glaucoma is the leading cause of irreversible blindness worldwide with prevalence growing from 64.3  
55 million in 2013 to 111.8 million in 2040.<sup>1,2</sup> In the United States, glaucoma is projected to affect 7.3 million  
56 people by 2050 with the majority being racial minorities.<sup>2</sup> The rising burden of glaucoma in the United  
57 States is exacerbated by a critical shortage of eye care providers; the total supply of ophthalmologists is  
58 projected to decrease by 12% while demand for eye care services is projected to increase by 24% by 2035.<sup>3</sup>  
59 Underserved racial minorities and individuals living in non-metro areas who already experience difficulty  
60 accessing care will likely be disproportionately affected, thereby exacerbating ongoing disparities in  
61 glaucoma care.<sup>7</sup> For example, Blacks and Hispanics in the US have a significantly higher risk of glaucoma-  
62 related blindness and need for glaucoma surgery compared to non-Hispanic Whites.<sup>4-7</sup> Therefore, there is  
63 an urgent need to develop and implement novel interventions that address the impending eye care crisis by  
64 ensuring timely and equitable detection of at-risk individuals.

65         The Los Angeles County (LAC) Department of Health Services (DHS), the second largest  
66 municipal health system in the United States, has operated a teleretinal screening program for newly  
67 diagnosed diabetics since 2013.<sup>19</sup> While the program primarily focuses on detecting diabetic retinopathy, it  
68 also screens for other ocular conditions, including cataracts and referable glaucoma. The referable glaucoma  
69 component of the program has been effective; between 2016 to 2018, 817 patients were referred for  
70 glaucoma evaluations, 534 (65.4%) patients successfully completed in-person evaluations, and 131 (24.5%)  
71 patients were diagnosed with glaucoma by LAC DHS clinicians.<sup>8</sup> Despite its success, the program is  
72 hindered by key workflow limitations. Reliance on trained optometrists to manually grade fundus  
73 photographs contributes to referral delays and takes time away from direct patient care. Manual grading by  
74 over 20 LAC DHS optometrists also potentially introduces inter-grader variability in disease detection.<sup>23</sup>  
75 Therefore, it is critical to consider alternative approaches for standardizing and streamlining referrals to  
76 ensure reproducibility and equity of care.

77         Artificial intelligence (AI), specifically deep learning (DL), is an emerging technology in  
78 healthcare that could enhance the reproducibility and efficiency of glaucoma screening, thereby enabling

79 earlier detection and intervention. In this study, we develop a DL algorithm for detecting referable glaucoma  
80 from optic nerve photos of patients in LAC DHS teleretinal screening program. We also perform a rigorous  
81 validation of the algorithm by comparing its performance to a panel of 13 eye care providers, including 4  
82 fellowship-trained glaucoma specialists. This type of algorithm, once rigorously validated against standard-  
83 of-care human grading, could be implemented to address the critical need for reproducible and scalable  
84 solutions in glaucoma screening, especially among vulnerable, safety net populations.

85

## 86 **Methods**

87 This study was approved by the University of Southern California Institutional Review Board. The study  
88 adhered to the tenets of the Declaration of Helsinki and complied with the Health Insurance Portability and  
89 Accountability Act.

90

## 91 **Data Source**

92 The LAC DHS health system administers a remote teleretinal screening program across 17 hospital- and  
93 community-based sites across Southern California.<sup>24</sup> The program serves around 1,750 newly diagnosed  
94 diabetics per month. LAC DHS patients participating in the program receive dilation and fundus  
95 photography by trained technicians using the Topcon NW400 and NW8 (Topcon Corporation, Tokyo,  
96 Japan) and Canon CR-2 AF Digital (Canon U.S.A. Inc, Huntington, NY) cameras. These photographs are  
97 evaluated primarily for diabetic retinopathy and secondarily for referable glaucoma, defined as cup-to-disc  
98 ratio (CDR)  $\geq 0.6$ , by 21 trained LAC DHS optometrists. Disease diagnoses, including for referable  
99 glaucoma, are recorded on the patient level. All patients 18 years of age or older with at least one fundus  
100 photograph taken between January 4, 2016 to December 2, 2022 were eligible for analysis.

101 A segmentation-free approach to detecting referable glaucoma was selected given: 1) generally  
102 superior diagnostic performance compared to segmentation-reliant approaches; and 2) lack of access to  
103 CDR and segmentation data in the LAC DHS dataset.<sup>9</sup> Fundus photos centered on the optic nerve from all  
104 patients diagnosed with referable glaucoma and a comparable number of patients diagnosed as non-

105 glaucoma were retrieved for purposes of AI algorithm development. All photos underwent manual  
106 review. Photos of low quality (e.g. blurry, underexposed or overexposed, or media opacities partially  
107 obscuring the optic nerve) were included to ensure generalizability of algorithms to real-world screening  
108 environments. However, photos were excluded if they could not be graded for glaucoma (e.g. media  
109 opacities totally obscuring the optic nerve, so out of focus that the optic nerve could not be delineated, or  
110 if the optic nerve was not in the field of view).

111 Fundus photos were cropped and centered around the optic nerve head for analysis in a two-step  
112 process that was programmed in Python. First, the program cropped each raw fundus image to the image  
113 region by removing any black or extraneous regions. Then, the program scanned the image using a sliding  
114 window approach that attempted to match the cropped image to the pattern of an optic disc. Once a potential  
115 match was found, that section of the image was saved as the final cropped image. If the program failed to  
116 locate or confirm an optic disc after multiple attempts, the entire uncropped image was saved. All images  
117 were manually reviewed to ensure cropping and centration were effective. Images where the optic disc was  
118 present but difficult to visualize due to occlusion or exposure issues were retained in the dataset to represent  
119 real-world scenarios. Images without an optic disc were excluded. Images were resized to 224 by 224 pixels  
120 to reduce hardware demands during training. Images were preprocessed by normalizing RGB channels and  
121 augmented through random rotation, translation, and perturbations to balance and contrast.

122

### 123 **Algorithm Development and Validation**

124 The LAC DHS dataset was divided into development (80%) and test (20%) datasets. The development  
125 dataset was further split into training (75%) and validation (25%) datasets. Some patients with multiple  
126 teleretinal screening visits were represented multiple times in the training and validation datasets, although  
127 reference labels by LAC DHS optometrists were unique for each visit. The test dataset was used to derive  
128 a sample of 1000 test images from 500 patients with no overlap of patients with the training or validation  
129 datasets.

130 Patient-level labels of referable glaucoma were provided by one of 21 trained LAC DHS

131 optometrists after analyzing photos of both eyes. These patient-level labels were generalized to photos from  
132 both eyes to train DL algorithms for detecting referable glaucoma on the eye level. A convolutional neural  
133 network (CNN) was developed based on the VGG-19 architecture using the training and validation datasets  
134 labeled in this manner. The VGG-19 architecture was chosen due to its efficiency with image-based data  
135 while providing similar performance to other architectures, including InceptionV3, MobileNetV3,  
136 EfficientNetV2, and ResNet50V2. The average pooling layer was replaced by an adaptive pooling layer  
137 where bin size is proportional to input image size, enabling the CNN to be applied to input images of  
138 arbitrary sizes. Softmax-regression was used to calculate the multinomial probability of the three classes  
139 with a cross-entropy loss used during training. All layers of the CNN were fine-tuned using  
140 backpropagation; optimization was performed using stochastic gradient descent with warm restarts. The  
141 algorithm was then fine-tuned using transfer learning from labels provided by a glaucoma specialist.

142         The DL algorithm was tested using the 1000-image test dataset, which was also graded by 13  
143 clinicians (1 optometrist, 7 general ophthalmologists, 1 neuro-ophthalmologist, and 4 glaucoma specialists)  
144 with between one to 15 years of clinical experience. Prior to grading, each of these clinicians was provided  
145 with a standardization dataset comprised of 20 images per CDR between 0.2 to 0.9 in 0.1-unit increments.  
146 As one objective of the study was to assess the effect of provider experience, the size of the sample dataset  
147 was limited to avoid strongly biasing providers with less experience.

148         Three sets of reference labels of the independent test set were used to assess algorithm performance.  
149 The LAC DHS optometrist reference labels were provided on the patient level by 21 trained LAC DHS  
150 optometrists who originally graded the photos in the test dataset. Expert panel reference labels were  
151 provided by 3 of the fellowship-trained glaucoma specialists (V.N., B.W., B.Y.X.) among the 13 study  
152 graders, with their majority diagnosis (at least 2 of 3) determining the glaucoma status for each individual  
153 photo. Expert panel reference labels were provided on the eye level and combined to generate patient-level  
154 labels; a patient was positive for referable glaucoma if at least one eye was labeled as such.

155

156 **Data Analysis**

157 Demographic characteristics between the training/validation and test sets were compared using a 2-tailed  
158 student t-test or a chi-square test. The study cohort was stratified by glaucoma status based on LAC DHS  
159 optometrist labels to compare demographic and clinical characteristics. Continuous measures were  
160 summarized by means and standard deviations and categorical measures were summarized by proportions  
161 and percentages. Area under the receiver operating characteristic curve (AUC), sensitivity, and specificity  
162 were calculated to assess algorithm performance compared to the sensitivity and specificity of individual  
163 clinician graders using all three sets of reference labels. A sub-analysis comparing LAC DHS optometrist  
164 and algorithm performance was performed for the LAC DHS six optometrists who graded the largest  
165 proportion of the independent test set using the expert panel reference labels. Linear regression was  
166 performed to assess the association between grader sensitivity or specificity and years of clinical  
167 experience. Statistical tests were considered statistically significant when the P value < 0.05. Statistical  
168 analyses were performed using Python's SciPy statistics library.

169

## 170 **Results**

171 A total of 13,098 images were retrieved, and 12,998 images were included in the analysis after excluding  
172 100 cropped images (0.76%) without visible optic nerves. The training dataset had 8,996 images from 4,212  
173 patients, the validation dataset had 3,002 images from 1,404 patients, and the test dataset had 1,000 images  
174 from 500 patients. The 5,616 patients (2,086 referable glaucoma, 3,530 non-glaucoma) in the training and  
175 validation datasets had mean age of  $56.8 \pm 10.5$  years, and there were 54.8% (N = 3091) females, 68.2%  
176 (N = 3826) Latinos, 8.9% (N = 501) Blacks, 2.7% (N = 153) Caucasians, 6.0% (N = 338) Asians, and  
177 14.2% (N = 798) Other or Not Specified race (Table 1). The 500 patients (250 referable glaucoma, 250  
178 non-glaucoma) in the test dataset had mean age of  $57.3 \pm 10.3$  years, and were 52.4% (N = 262) females,  
179 69.2% (N = 346) Latino, 8.6% (N = 43) Black, 2.6% (N = 13) Caucasian, 5.2% (N = 26) Asian, and 15.0%  
180 (N = 75) Other or Not Specified race (Figure 1). There was no difference in age ( $p = 0.295$ ), race ( $p =$   
181  $0.781$ ), or sex ( $p = 0.569$ ) between patients in the training/validation and test datasets (Table 1).

182 Algorithm performance for detecting referable glaucoma on the patient level based on expert panel

183 labels of the test dataset had an AUC of 0.93 (95% CI, 0.91-0.95), with a sensitivity of 0.89 and specificity  
184 of 0.83. Individual graders had a sensitivity ranging from 0.33 to 0.99 and a specificity ranging from 0.68  
185 to 0.98, including a sensitivity of 0.98 and specificity of 0.79 by a 4<sup>th</sup> glaucoma specialist (Figure 1). There  
186 was no association between years of clinical experience and grader sensitivity ( $p = 0.491$ ) or specificity ( $p$   
187  $= 0.559$ ) (Figure 2).

188         Algorithm performance for detecting referable glaucoma on the patient level based on LAC DHS  
189 optometrist labels of the test dataset had an AUC of 0.92 (95% CI, 0.90-0.94). Individual graders, including  
190 a 4<sup>th</sup> glaucoma specialist, had a sensitivity ranging from 0.32 to 0.91 and a specificity ranging from 0.61 to  
191 0.98 (Figure 3).

192         Algorithm performance on the eye level based on expert panel labels of the test dataset had an AUC  
193 of 0.92 (95% CI, 0.90-0.93) with a sensitivity of 0.85 and specificity of 0.83. Individual graders had a  
194 sensitivity ranging from 0.28 to 0.99 and a specificity ranging from 0.74 to 0.99, including a sensitivity of  
195 0.90 and specificity of 0.82 by a 4<sup>th</sup> glaucoma specialist (Supplementary Figure 2).

196         In the sub-analysis of the 6 most frequent LAC DHS optometrist graders ( $N = 70$  to 150 images),  
197 the DL algorithm (AUC = 0.93) approximated or exceeded optometrist sensitivity (range: 0.78 to 1.0) and  
198 specificity (range: 0.32 to 0.87) in all 6 cases (Figure 4).

199

## 200 **Discussion**

201 In this study, we developed a DL algorithm for detecting referable glaucoma from fundus photographs of  
202 LAC DHS teleretinal screening patients that matched or exceeded performance by clinicians with a wide  
203 range of clinical expertise, including LAC DHS optometrists and independent ophthalmologists. The  
204 algorithm, trained on patient-level labels provided by 21 trained LAC DHS optometrists, demonstrated  
205 robust performance across three sets of reference labels. In addition, LAC DHS optometrists independent  
206 ophthalmologists exhibited wide ranges of sensitivity and specificity that raise concerns about variability  
207 associated with human grading of fundus photographs. Our findings highlight potential benefits of adopting  
208 AI-based strategies to improve the reproducibility, timeliness, and scalability of glaucoma care, which



209 could lead to earlier glaucoma detection and intervention.

210 While several DL algorithms for detecting referable or manifest glaucoma from fundus  
211 photographs have previously been reported, none have been as rigorously validated against standard-of-  
212 care human grading as in the current study.<sup>10-13</sup> Our algorithm's performance (AUC > 0.9) falls within the  
213 general range of performance demonstrated by these previous algorithms.<sup>9-14</sup> However, it is difficult to  
214 evaluate algorithm performance based solely on comparisons with previous algorithms due to inter-study  
215 differences in disease definitions, study populations, and AI methodology. Therefore, we focused on  
216 producing a higher level of evidence to instill confidence in LAC DHS clinicians, patients, and healthcare  
217 administrators, especially given our plan to implement the algorithm in a real-world teleretinal screening  
218 environment. In a rigorous comparison with human graders, our algorithm demonstrated excellent  
219 performance, matching or exceeding the sensitivity and specificity of 13 independent clinicians with a wide  
220 range of clinical experience. In a separate sub-analysis, the algorithm also matched or outperformed 6  
221 current LAC DHS optometrists. This robust performance compared to current standard-of-care human  
222 grading provides evidence supporting algorithm integration into existing LAC DHS teleretinal screening  
223 workflows to improve timeliness of referable glaucoma detection and re-allocate optometrist time for direct  
224 eye care.

225 We tested our DL algorithm using three different sets of reference labels to further assess the  
226 robustness of its performance. It is somewhat unsurprising that the algorithm matched or outperformed  
227 independent human graders when test labels were provided by the same LAC DHS optometrists who  
228 provided the training labels. However, it is interesting that the algorithm matched or outperformed  
229 independent human graders even when using test labels provided by an expert panel of three glaucoma  
230 specialists. The robust performance observed across test labels may partially stem from the diversity of  
231 training labels by 21 LAC DHS optometrists, which is likely advantageous when automating a task that is  
232 inherently variable on the individual-grader level.<sup>26</sup> It may also partially stem from using reference labels  
233 provided by real-world LAC DHS optometrists rather than specially trained study graders. Using real-world  
234 training labels could help minimize the Hawthorne effect, by which individuals may modify their behaviors

235 in response to being observed or scrutinized, thereby making the labels more applicable in real-world  
236 clinical settings.<sup>28</sup> It is also interesting that our algorithm, which was trained on patient-level training labels  
237 generalized to both eyes, maintained stable performance even when tested using eye-level reference labels.  
238 This suggests that the majority of referable glaucoma was bilateral and that our approach was resistant to  
239 noisy training labels to some degree.

240 The high degree of variability among clinicians in referable glaucoma detection regardless of  
241 experience level presents a significant barrier for teleglaucoma screening programs. Our finding is  
242 consistent with previous studies that reported high variability among optometrists and/or ophthalmologists  
243 in grading CDR or detecting manifest glaucoma from fundus photographs.<sup>23,27</sup> This highlights an important  
244 issue associated with human grading in teleretinal screening workflows; systematic biases by graders can  
245 lead to large-scale over- or under-detection of disease, making it difficult to standardize disease detection  
246 and limiting the scalability of teleglaucoma screening overall. This variability was also not correlated with  
247 experience level, which suggests that it may be an intrinsic property of graders that is not easily modifiable,  
248 even with extensive training. In contrast to human graders, AI algorithms can be trained using collective  
249 labels provided by a large number of graders, which may help mitigate systematic biases associated with a  
250 small number of undercallers (high specificity) or overcallers (high sensitivity). AI algorithms also provide  
251 consistent and reproducible image analysis, and sensitivity and specificity can be tailored to suit the specific  
252 needs and capacities of individual healthcare systems. Therefore, the relatively unbiased, reproducible, and  
253 adaptable nature of certain AI algorithms may make them better suited for large-scale, high throughput  
254 teleretinal screening.

255 Our study has some limitations. First, our training data reflects the unique demographics of the  
256 communities served by LAC DHS, which may limit algorithm generalizability in other populations.<sup>2,5</sup> This  
257 concern is mitigated by our primary intention to implement the algorithm locally in the LAC DHS teleretinal  
258 screening program. However, if the algorithm is implemented more widely in the future, it would likely  
259 benefit from re-tuning using data from local populations. Second, the utility of glaucoma screening in the  
260 general population remains unclear, which calls into question the role of algorithms for detecting referable

261 glaucoma.<sup>25</sup> However, LAC DHS serves a high-risk population that is predominantly Latino, which may  
262 explain why glaucoma referrals at a CDR cutoff of 0.6 are high yield; around a quarter of LAC DHS  
263 teleretinal patients detected with referable glaucoma were diagnosed with manifest glaucoma after in-office  
264 evaluation.<sup>8</sup> Finally, our algorithm only evaluates single fundus photographs, which is rather simplistic  
265 compared to the comprehensive glaucoma evaluation.<sup>8</sup> However, it is important to point out that we plan  
266 to implement this algorithm in resource-constrained screening environments, where the cost of expensive  
267 diagnostic tests is prohibitive and the effectiveness of fundus photography alone has been demonstrated.  
268 Nevertheless, it is important to consider future opportunities to incorporate accessible factors, such as age  
269 and race, that could improve the predictive accuracy of glaucoma referrals and minimize the burden placed  
270 on the LAC DHS health system.<sup>16</sup>

271 In conclusion, the performance of our DL algorithm for detecting referable glaucoma matched or  
272 exceeded LAC DHS optometrists and independent clinicians, including glaucoma specialists.  
273 Implementation of validated AI algorithms that approximate expert-level performance into existing clinical  
274 workflows could enhance the timeliness and quality of care while also conserving clinician time for direct  
275 patient care, which is a valuable commodity in resource-constrained healthcare systems providing care to  
276 undeserved, safety net populations.<sup>29-31</sup> AI can also provide more reproducible and adaptable diagnostic  
277 capabilities, ensuring that more patients have consistent access to a higher standard of care.<sup>21</sup> However,  
278 further work is needed to address technical, ethical, and legal questions surrounding AI for glaucoma care  
279 prior to wide-spread implementation.<sup>17,18</sup>

280

## 281 **Acknowledgements**

282 This work was supported by grant R01 EY035677 and K23 EY032985 from the National Eye Institute,  
283 National Institutes of Health, Bethesda, Maryland; a DHS-USC Safety Net Innovation Award from the  
284 Southern California Clinical and Translational Science Institute; a AI4Health Award from the University  
285 of Southern California; and an unrestricted grant to the Department of Ophthalmology from Research to  
286 Prevent Blindness, New York, NY.

287 **References**

- 288 1. GBD 2019 Blindness and Vision Impairment Collaborators, Vision Loss Expert Group of the Global  
289 Burden of Disease Study. Causes of blindness and vision impairment in 2020 and trends over 30 years,  
290 and prevalence of avoidable blindness in relation to VISION 2020: the Right to Sight: an analysis for  
291 the Global Burden of Disease Study. *Lancet Glob Health*. 2021;9(2):e144-e160. doi:10.1016/S2214-  
292 109X(20)30489-7
- 293 2. Vajaranant TS, Wu S, Torres M, Varma R. The changing face of primary open-angle glaucoma in the  
294 United States: demographic and geographic changes from 2011 to 2050. *Am J Ophthalmol*.  
295 2012;154(2):303-314.e3. doi:10.1016/j.ajo.2012.02.024
- 296 3. Berkowitz ST, Finn AP, Parikh R, Kuriyan AE, Patel S. Ophthalmology Workforce Projections in the  
297 United States, 2020 to 2035. *Ophthalmology*. 2024;131(2):133-139.  
298 doi:10.1016/j.opthta.2023.09.018
- 299 4. Tielsch JM, Sommer A, Katz J, Royall RM, Quigley HA, Javitt J. Racial variations in the prevalence  
300 of primary open-angle glaucoma. The Baltimore Eye Survey. *JAMA*. 1991;266(3):369-374.  
301 <https://www.ncbi.nlm.nih.gov/pubmed/2056646>.
- 302 5. Varma R, Wang D, Wu C, et al. Four-year incidence of open-angle glaucoma and ocular hypertension:  
303 the Los Angeles Latino Eye Study. *Am J Ophthalmol*. 2012;154(2):315-325.e1.  
304 doi:10.1016/j.ajo.2012.02.014
- 305 6. Barquet-Pizá V, Siegfried CJ. Understanding racial disparities of glaucoma. *Curr Opin Ophthalmol*.  
306 2024;35(2):97-103. doi:10.1097/ICU.0000000000001017
- 307 7. Davuluru SS, Jess AT, Kim JSB, Yoo K, Nguyen V, Xu BY. Identifying, Understanding, and  
308 Addressing Disparities in Glaucoma Care in the United States. *Transl Vis Sci Technol*. 2023;12(10):18.  
309 doi:10.1167/tvst.12.10.18
- 310 8. Yuen J, Xu B, Song BJ, Daskivich LP, Rodman J, Wong BJ. Effectiveness of Glaucoma Screening  
311 and Factors Associated with Follow-up Adherence among Glaucoma Suspects in a Safety-Net  
312 Teleretinal Screening Program. *Ophthalmol Glaucoma*. 2023;6(3):247-254.

313 doi:10.1016/j.ogla.2022.10.007

314 9. Chaurasia AK, Greatbatch CJ, Hewitt AW. Diagnostic Accuracy of Artificial Intelligence in Glaucoma

315 Screening and Clinical Practice. *J Glaucoma*. 2022;31(5):285-299.

316 doi:10.1097/IJG.0000000000002015

317 10. Li Z, He Y, Keel S, Meng W, Chang RT, He M. Efficacy of a Deep Learning System for Detecting

318 Glaucomatous Optic Neuropathy Based on Color Fundus Photographs. *Ophthalmology*.

319 2018;125(8):1199-1206. doi:10.1016/j.ophtha.2018.01.023

320 11. Medeiros FA, Jammal AA, Mariottoni EB. Detection of Progressive Glaucomatous Optic Nerve

321 Damage on Fundus Photographs with Deep Learning. *Ophthalmology*. 2021;128(3):383-392.

322 doi:10.1016/j.ophtha.2020.07.045

323 12. Li F, Yan L, Wang Y, et al. Deep learning-based automated detection of glaucomatous optic

324 neuropathy on color fundus photographs. *Graefes Arch Clin Exp Ophthalmol*. 2020;258(4):851-867.

325 doi:10.1007/s00417-020-04609-8

326 13. Al-Aswad LA, Kapoor R, Chu CK, et al. Evaluation of a Deep Learning System For Identifying

327 Glaucomatous Optic Neuropathy Based on Color Fundus Photographs. *J Glaucoma*.

328 2019;28(12):1029-1034. doi:10.1097/IJG.0000000000001319

329 14. Murtagh P, Greene G, O'Brien C. Current applications of machine learning in the screening and

330 diagnosis of glaucoma: a systematic review and Meta-analysis. *Int J Ophthalmol*. 2020;13(1):149-162.

331 doi:10.18240/ijo.2020.01.22

332 15. Abramoff MD, Tarver ME, Loyo-Berrios N, et al. Considerations for addressing bias in artificial

333 intelligence for health equity. *NPJ Digit Med*. 2023;6(1):170. doi:10.1038/s41746-023-00913-9

334 16. Thompson AC, Jammal AA, Medeiros FA. A Review of Deep Learning for Screening, Diagnosis, and

335 Detection of Glaucoma Progression. *Transl Vis Sci Technol*. 2020;9(2):42. doi:10.1167/tvst.9.2.42

336 17. Al-Aswad LA, Ramachandran R, Schuman JS, Medeiros F, Eydelman MB, Collaborative Community

337 for Ophthalmic Imaging Executive Committee and Glaucoma Workgroup. Artificial Intelligence for

338 Glaucoma: Creating and Implementing Artificial Intelligence for Disease Detection and Progression.

- 339 *Ophthalmol Glaucoma*. 2022;5(5):e16-e25. doi:10.1016/j.ogla.2022.02.010
- 340 18. Abràmoff MD, Cunningham B, Patel B, et al. Foundational Considerations for Artificial Intelligence  
341 Using Ophthalmic Images. *Ophthalmology*. 2022;129(2):e14-e32. doi:10.1016/j.opthta.2021.08.023
- 342 19. Daskivich LP, Vasquez C, Martinez C Jr, Tseng CH, Mangione CM. Implementation and Evaluation  
343 of a Large-Scale Teleretinal Diabetic Retinopathy Screening Program in the Los Angeles County  
344 Department of Health Services. *JAMA Intern Med*. 2017;177(5):642-649.  
345 doi:10.1001/jamainternmed.2017.0204
- 346 20. Ting DSW, Cheung CY, Lim G, et al. Development and validation of a deep learning system for  
347 diabetic retinopathy and related eye diseases using retinal images from multiethnic populations with  
348 diabetes. *JAMA* 2017;318:2211–23.
- 349 21. Abràmoff, M.D., Lavin, P.T., Birch, M. *et al*. Pivotal trial of an autonomous AI-based diagnostic  
350 system for detection of diabetic retinopathy in primary care offices. *npj Digital Med* 1, 39 (2018).  
351 <https://doi.org/10.1038/s41746-018-0040-6>
- 352 22. Tham YC, Li X, Wong TY, Quigley HA, Aung T, Cheng CY. Global prevalence of glaucoma and  
353 projections of glaucoma burden through 2040: a systematic review and meta-analysis. *Ophthalmology*.  
354 2014;121(11):2081-2090. doi:10.1016/j.opthta.2014.05.013
- 355 23. Varma R, Steinmann WC, Scott IU. Expert agreement in evaluating the optic disc for  
356 glaucoma. *Ophthalmology*. 1992;99(2):215-221. doi:10.1016/s0161-6420(92)31990-6
- 357 24. Daskivich LP, Vasquez C, Martinez C, Tseng C, Mangione CM. Implementation and Evaluation of a  
358 Large-Scale Teleretinal Diabetic Retinopathy Screening Program in the Los Angeles County  
359 Department of Health Services. *JAMA Intern Med*. 2017;177(5):642–649.  
360 doi:10.1001/jamainternmed.2017.0204
- 361 25. Recommendation: Primary Open-Angle Glaucoma: Screening | United States Preventive Services  
362 Taskforce. May 24, 2022. Accessed July 17, 2024.
- 363 26. Gulshan V, Peng L, Coram M, et al. Development and Validation of a Deep Learning Algorithm for  
364 Detection of Diabetic Retinopathy in Retinal Fundus Photographs. *JAMA*. 2016;316(22):2402–2410.

365 doi:10.1001/jama.2016.17216

366 27. Harper R, Reeves B, Smith G. Observer variability in optic disc assessment: implications for glaucoma  
367 shared care. *Ophthalmic Physiol Opt.* 2000;20(4):265-273.

368 28. McCambridge J, Witton J, Elbourne DR. Systematic review of the Hawthorne effect: new concepts are  
369 needed to study research participation effects. *J Clin Epidemiol.* 2014;67(3):267-277.  
370 doi:10.1016/j.jclinepi.2013.08.015

371 29. Xu BY, Chiang M, Chaudhary S, Kulkarni S, Pardeshi AA, Varma R. Deep Learning Classifiers for  
372 Automated Detection of Gonioscopic Angle Closure Based on Anterior Segment OCT Images. *Am J*  
373 *Ophthalmol.* 2019;208:273-280. doi:10.1016/j.ajo.2019.08.004

374 30. Xu BY, Chiang M, Pardeshi AA, Moghimi S, Varma R. Deep Neural Network for Scleral Spur  
375 Detection in Anterior Segment OCT Images: The Chinese American Eye Study. *Transl Vis Sci*  
376 *Technol.* 2020;9(2):18. Published 2020 Mar 30. doi:10.1167/tvst.9.2.18

377 31. Bolo K, Apolo Aroca G, Pardeshi AA, et al. Automated expert-level scleral spur detection and  
378 quantitative biometric analysis on the ANTERION anterior segment OCT system. *Br J Ophthalmol.*  
379 2024;108(5):702-709. Published 2024 May 21. doi:10.1136/bjo-2022-322328

380

381

382

383

384

385

386

387

388

389

390

391 **Table and Figure Captions**

392

393 **Table 1.** Baseline demographics stratified by training/validation or test dataset.

| <b>Parameter</b>       | <b>Training/Validation</b> | <b>Test</b>     | <b>P-value</b> |
|------------------------|----------------------------|-----------------|----------------|
| Age                    | 56.8 ± 10.5                | 57.3 ± 10.3     | 0.30           |
| Sex                    |                            |                 | 0.57           |
| Female                 | 55.0% (N = 3091)           | 52.4% (N = 262) |                |
| Male                   | 42.8% (N = 2401)           | 44.8% (N = 224) |                |
| Race                   |                            |                 | 0.78           |
| Latinos                | 68.1% (N = 3826)           | 69.2% (N = 346) |                |
| Blacks                 | 8.9% (N = 501)             | 8.6% (N = 43)   |                |
| Caucasians             | 2.7% (N = 153)             | 2.6% (N = 13)   |                |
| Asians                 | 6.0% (N = 338)             | 5.2% (N = 26)   |                |
| Other or Not Specified | 14.2% (N = 798)            | 15.0% (N = 75)  |                |
| Glaucoma status        |                            |                 | < 0.001        |
| Referable              | 37.1% (N = 2086)           | 50.0% (N = 250) |                |
| Non-Referable          | 62.9% (N = 3530)           | 50.0% (N = 250) |                |

394

395 Statistical significance tested by 2-tailed student t-test or Chi-squared test.

396

397

398

399

400

401

402

403

404

405

406

407

408



409 **Figure 1.** Patient-level algorithm and independent clinician performance (with years of experience) when  
410 using patient-level expert panel reference labels.

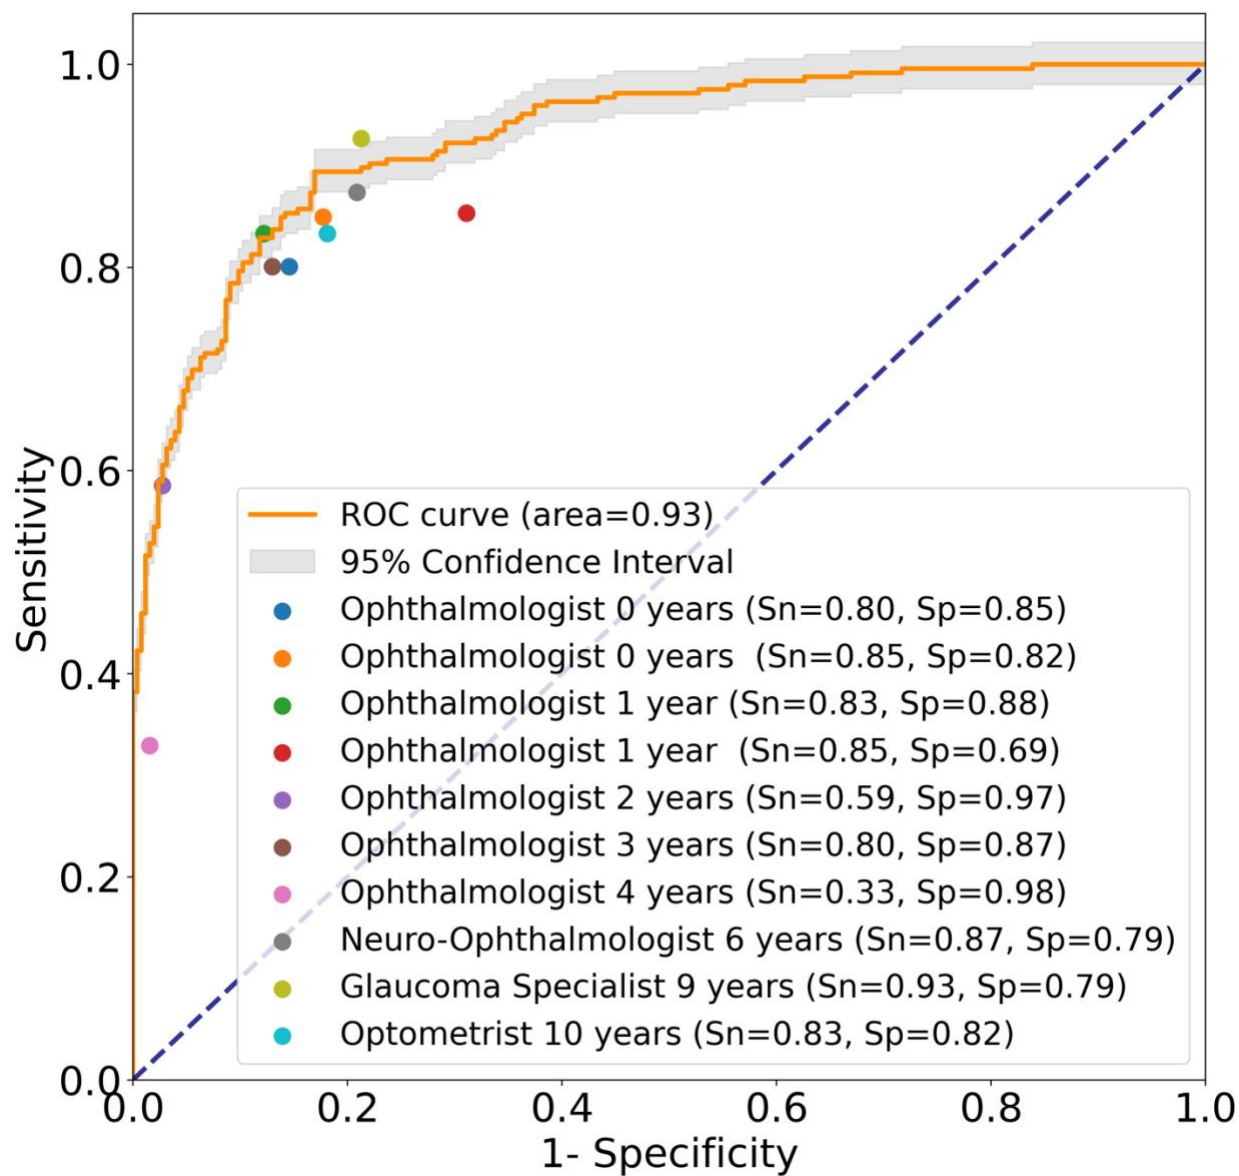

411

412 Sn = Sensitivity; Sp = Specificity.

413

414

415

416

417

418 **Figure 2.** Correlation between sensitivity (left) or specificity (right) in detecting referable glaucoma and  
419 years of clinical experience among independent clinician graders.

420

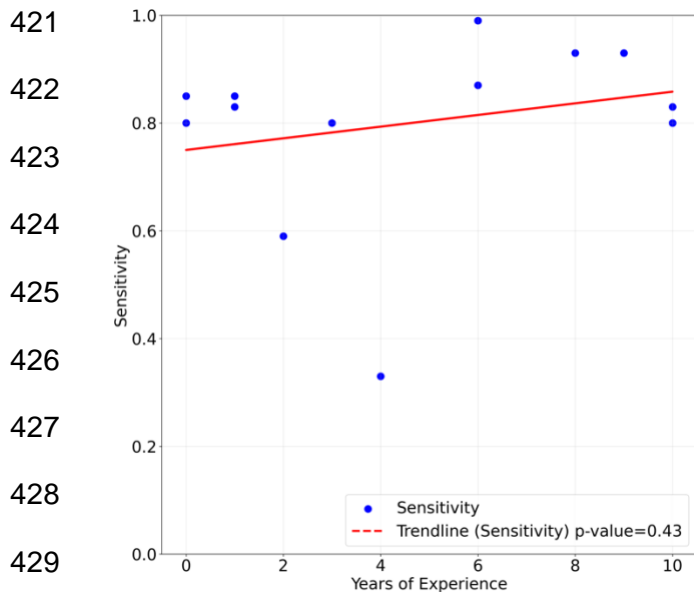

429

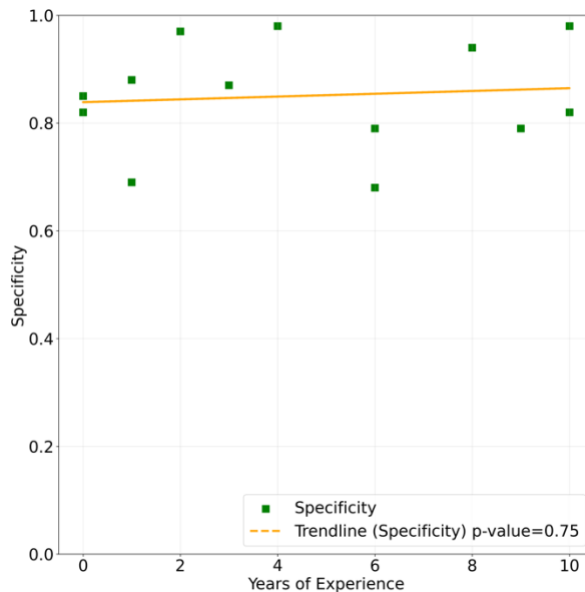

430

431

432

433

434

435

436

437

438

439

440

441

442

443

444 **Figure 3.** Patient-level algorithm and independent clinician performance (with years of experience) when  
445 using patient-level Los Angeles County Department of Health Services (LAC DHS) optometrist  
446 reference labels.  
447

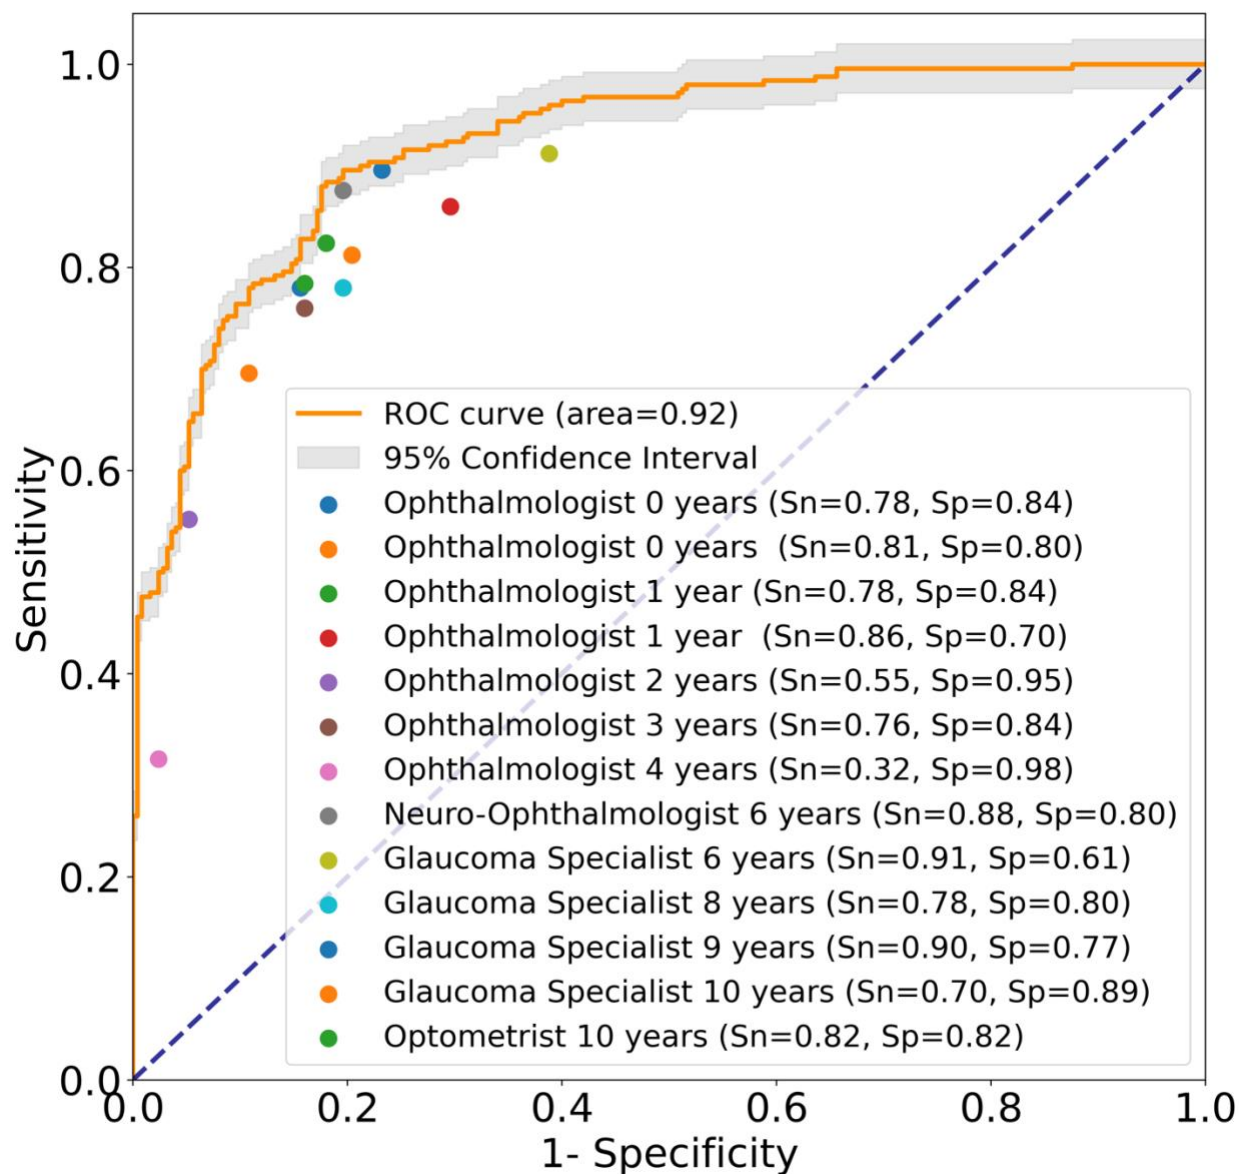

448  
449 Sn = Sensitivity; Sp = Specificity.

450  
451  
452

453 **Figure 4:** Sub-analysis of patient-level algorithm and 6 LAC DHS optometrist performance in subsets of  
454 the test dataset when using patient-level expert panel reference labels.

455

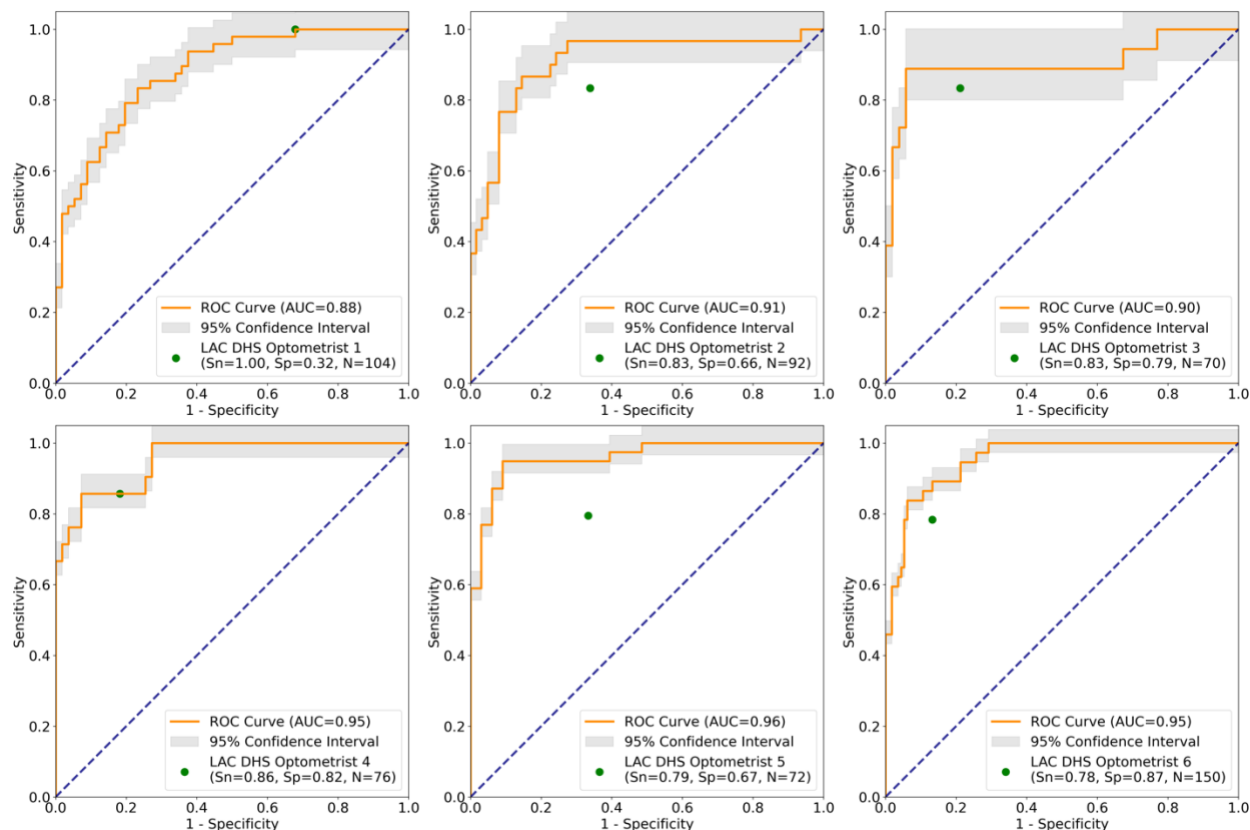

456

457 Sn = Sensitivity; Sp = Specificity.

458

459

460

461

462

463

464

465

466

467 Supplementary Figure 1: Eye-level algorithm and independent clinician performance (with years of  
468 experience) when using patient-level expert panel reference labels.  
469

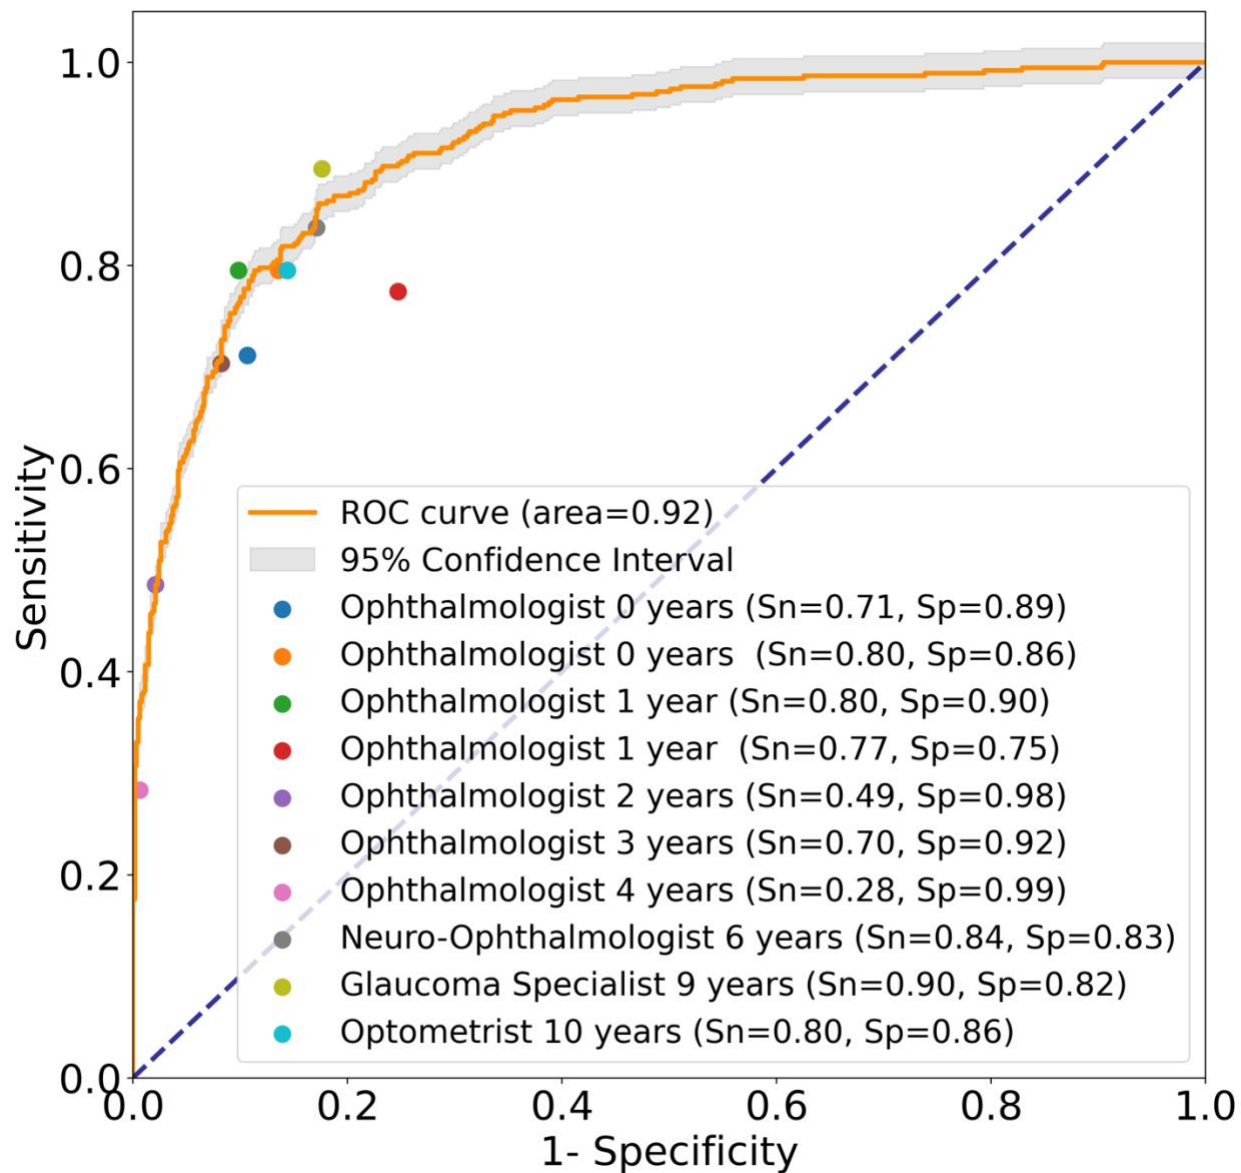

470

471 Sn = Sensitivity; Sp = Specificity.
